# Supplementary material for: Tropical tropospheric ozone trends (1998 to 2023): new perspectives from SHADOZ, IAGOS and OMI/MLS observations
Source: Copernicus journal article supplement (doi:10.5194/acp-25-18475-2025), 2025-12-19
Supplement: Supplementary file 1 [file acp-25-18475-2025-supplement.pdf]

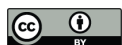

*Supplement of*

## **Tropical tropospheric ozone trends (1998 to 2023): new perspectives from SHADOZ, IAGOS and OMI/MLS observations**

**Anne M. Thompson et al.**

*Correspondence to:* Anne M. Thompson ([anne.m.thompson@nasa.gov](mailto:anne.m.thompson@nasa.gov))

The copyright of individual parts of the supplement might differ from the article licence.

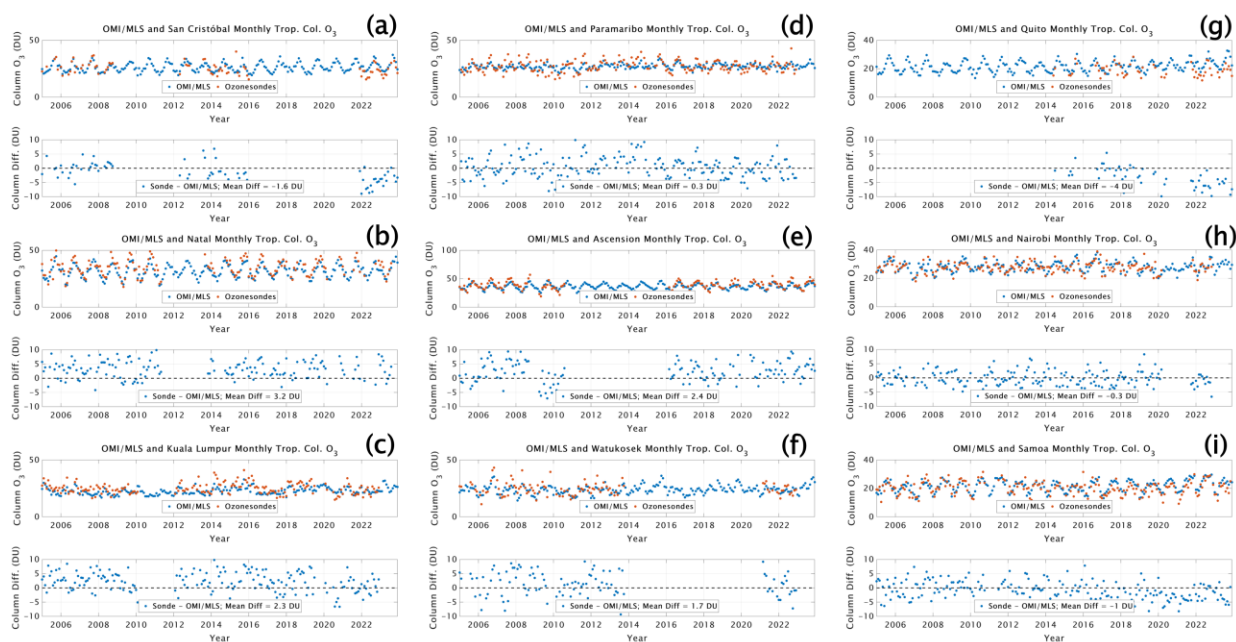

**Supplementary Figure S1.** For the nine SHADOZ stations analyzed (eight T21 plus Quito), the upper panels in (a) –(i) give monthly mean tropospheric column ozone,  $\text{TrCO}_{\text{sonde}}$ , in DU, estimated from the most recent OMI/MLS residual satellite product (Gaudel et al., 2024) and integrated from surface to tropopause from SHADOZ data. Tropopauses for both the integrated ozonesonde column and the OMI/MLS column estimate are determined using the WMO lapse rate tropopause. In text, the column integrals are referred to as  $\text{TrCO}_{\text{satellite}}$  for the OMI/MLS and  $\text{TrCO}_{\text{sonde}}$  for the SHADOZ data. Lower panels give the difference between the two tropospheric columns in DU (blue) with the mean difference over the periods of record indicated in the legend (ozonesonde-OMI/MLS).
